# Supplementary material for: Reduced m6A mRNA methylation is correlated with the progression of human cervical cancer
Source: PubMed Central journal article supplement (PMC5716777; doi:10.18632/oncotarget.22041), 2017-10-24
Supplement: oncotarget-08-98918-s001.pdf [file oncotarget-08-98918-s001.pdf]

## Reduced m<sup>6</sup>A mRNA methylation is correlated with the progression of human cervical cancer

### SUPPLEMENTARY MATERIALS

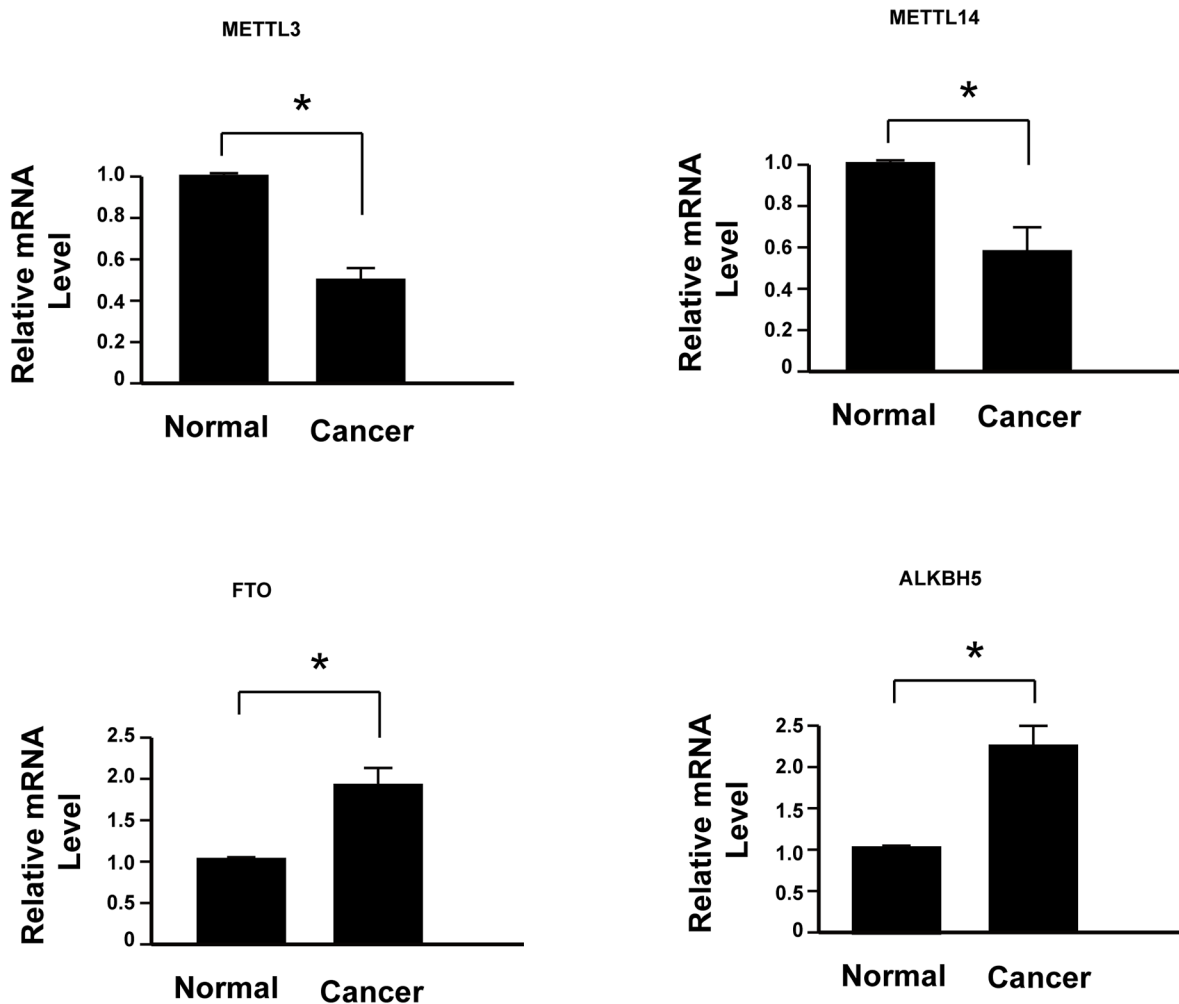

Supplementary Figure 1: The relative mRNA level of METTL3, METTL14, FTO and ALKBH5 was determined by qPCR (n=286). \*  $P < 0.05$ .

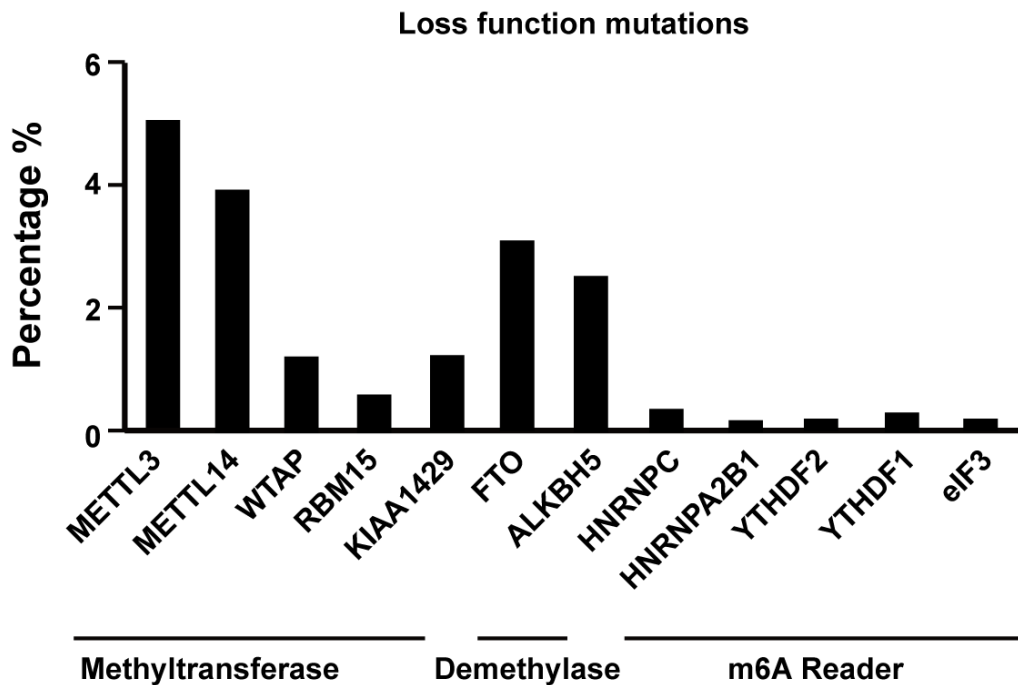

Supplementary Figure 2: Gene mutation frequency that would cause loss function of the gene, including large sequence deletion (>100bp), nonsense mutation, frame shift mutation and missense mutations which are known to cause loss of function (n=286).

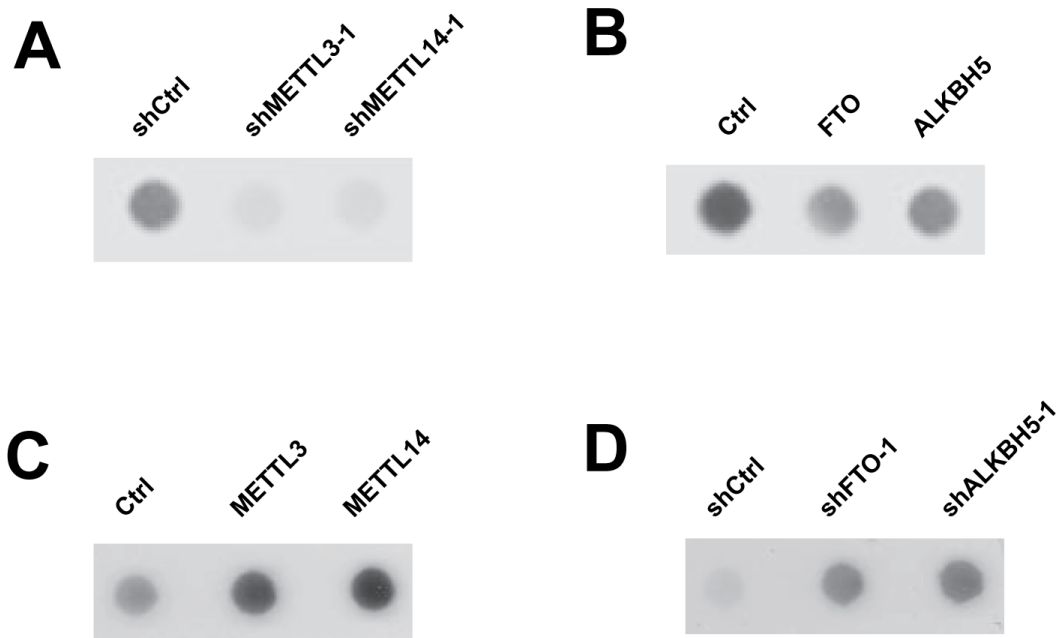

Supplementary Figure 3: Dot blot analysis of m6A levels after knocking down or overexpressing m<sup>6</sup>A regulations.

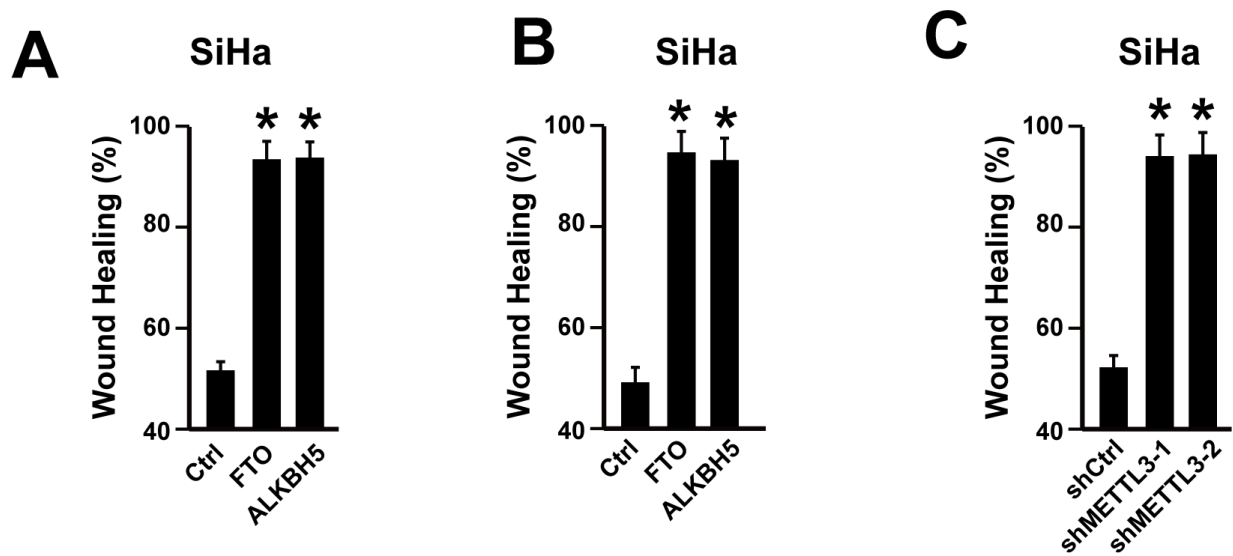

**Supplementary Figure 4: Reducing m<sup>6</sup>A level promoted cervical cancer cell migration.** (A) Knocking down METTL3 promoted cell migration. n = 3. \*  $P < 0.05$ . (B) Knocking down METTL14 promoted cell migration. n = 3. \*  $P < 0.05$ . (C) Overexpressing FTO and ALKBH5 promoted cell migration. n = 3. \*  $P < 0.05$ .

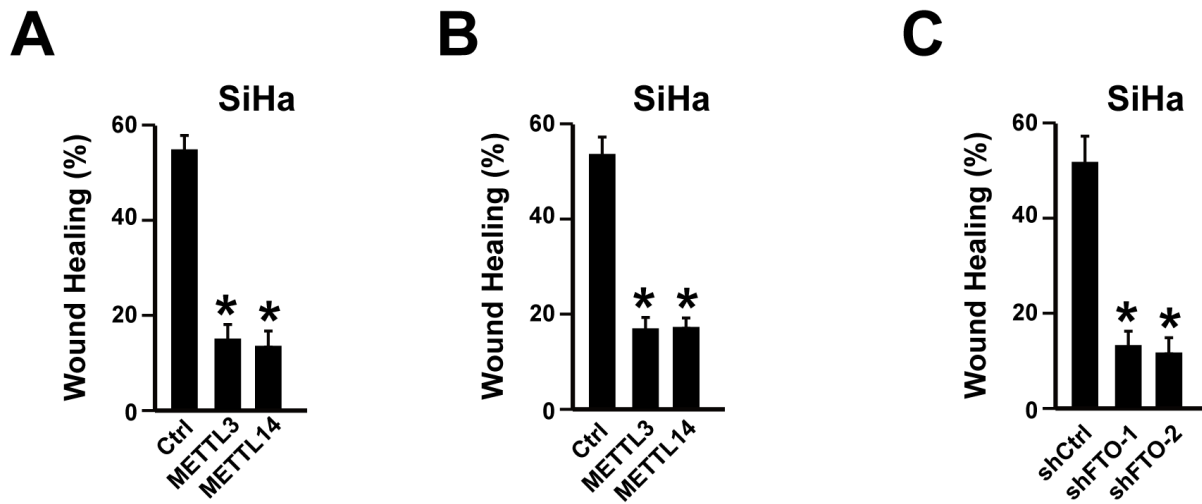

**Supplementary Figure 5: Increasing m<sup>6</sup>A level suppressed cervical cancer cell migration.** (A) Knocking down FTO suppressed cell migration. n = 3. \*  $P < 0.05$ . (B) Knocking down ALKBH5 suppressed cell migration. n = 3. \*  $P < 0.05$ . (C) Overexpressing METTL3 and METTL14 suppressed cell migration. n = 3. \*  $P < 0.05$ .
